# Supplementary material for: Genetic and Epigenetic Approaches for the Possible Detection of Adulteration and Auto-Adulteration in Saffron (Crocus sativus L.) Spice
Source: PubMed Central journal article supplement (PMC6273936; doi:10.3390/molecules21030343), 2016-03-11
Supplement: molecules-21-00343-s001.pdf [file molecules-21-00343-s001.pdf]

# Supplementary Materials: Genetic and Epigenetic Approaches for the Possible Detection of Adulteration and Auto-Adulteration in Saffron (*Crocus sativus* L.) Spice

Giovanna Soffritti , Matteo Busconi , Rosa Ana Sánchez , Jean-Marie Thiercelin ,  
Moschos Polissiou , Marta Roldán and José Antonio Fernández

## Maturase K sequences

>*Gardenia jasminoides* plastid gene maturase K (matK), partial cds;

```
ACCAGTCCATCTGGAAATCTTGGTTCAAACCTTCGCTATTGGGTAAAAGACGCCTCTTCC
TTGCATTTATTACGATTCTTTTTCCACGAATATTGGAATTGGGATACTCTTATTGATAGAAAG
AAACCCAGTTTTTATTTTTACCAAAAAGAAATCAAAAATTATTCTTCTTGTATATAATTCT
CATGTATGGAATACGAATCCATTTTCTTCTTCTCCGTAAGGAATCTTCTCATTGCGATCA
ACATCTTTTGGAGTCTTCTTGAACGGATATATTCTATGAAAAAAGAACGCTTGTAGA
AGTCTTTGCTAAGGATTTTCAAGCCAGTATATGGTTGTTCAAAGATCCTTTCATACATTATGT
TAGGTATCAAGGAAAATCCATTCTGGTTTCAAATGGGACGCCTCTTTTGATGAATAAATGG
AAATCTTACCTGTCAATTTTTGGCAATGTCATTTTGGTATTTGGTTTACCCCGGAAGGGTC
TATATAAACCAATTACCCAACCTTCCCTTAACCTTATGGGCTATCTGTCAAGTGTGCGACT
AAACCATTCAATGGTACGGAGTCAAATGCTAGAAAATTCATTTCTAATCAATAATGCTATT
AAGAAATTTGATACCCTTGTCCACTTATCCCTCATTGGATCATTGGCTAAAGCGAAATT
TTGTAACCTTATTAGGACATCCCATTAGTAAGCCGATTGGACTGATTGGCAGATTCTGATA
TTATTGACCGATTTTTGCATATATGCAAAAACCTTCTCATTATTATAGCGGATCTTCCAAA
AAAAGAGTTTGTATCGAATAAAGTATATACTTCGACTTCTTGTGCTAAAACCTTGGCTCGT
AAACACAAAAGTACTGTACG
```

>*Buddleja officinalis* plastid gene maturase K (matK), partial cds;

```
ACCCTGTCCATGCAGAAATCTTGGTTCAAACCTTCGCTATTGGGTAAAAGATGCCTCTTCT
TTGCATTTATTACGATTCTTCTCAACGAGTCTTGTAAATTGGAATAGTCTTATTACTCCAAAG
AAAGCCAGTTCCTCTTTTTCAAAAAGAAATCAAAGATTATTCTTATTCTTATATAATTCTCAT
GTATGTGAATACGAATCCATTTTCGTCCTTCTACGTAATCAATCTTCTCATTAAAGATCAACA
TCTTCTGGAGTTTTTCTTGAACGAATCTATTCTATGGAAAAATAGAACGCTTGTGAACGTC
TTTGTTAAGGTTAAGGATTTTCAAGGAGAACCTATGGTTGGTCAAGGAACCTTGCATGCATTA
TGTTAGGTATCAAAGCAAATCCATTCTGGCTTCAAAGGGACGCTCTTTTTAATGAATAAAT
GGAAATGGTACCTTGTCACTTTTTGGCAATGGTATTTTTCGCTTTGGTTTCATCCAAGAAAGA
TTTATATAAACCAATTATCCAATCATTCCCTTGAATTTTTGGGCTATCTTCAAGCGTGCAGAA
TGAACCCTTCAGTGGTACGGAGTCAAATTCTAGAAAATTCATTTCTAATCAATAATGCTATT
AAGAAGTTCGATACTCTTGTCCAATTATCCGCTGATTGCGTCATTGGCTAAAGCGAAATT
TTGTAACGTATTAGGGCATCCCATAAGTAAGCCGTTTGGGCTGATTTATCAGATTCTAATA
TTATTGATCGATTTGGGCGTATATGCAGAAACCTTCTCATTATCATAGCGGATCTTCCAAA
AAAAGAGTTTGTATCGAATAAAGTATATACTTCGACTTCTTGTGCTAGAACCTTGGCTCG
TAAACACAAAAGTACTGTACG
```

>*Curcuma longa* plastid gene maturase K (matK), partial cds;

```
ACCCTGTCCATGCAGAAATCTTGGTTCAAATGCTTCAATCCTGGATCCAGGATGTTCTCTCTT
TACATTTATTGCAGTTCCTTCTCCACGAATATTATAAATTGGACTAGTCTCATTATTCCGAAA
AATCTATTTACGATTTTTCAAAAAGAAAATAAAGACTATTTTGGTTCTTATATAATTTATATA
TATATGAATACGAATTTCTATTAGTGTTCCTTGTAACAATCCCTTTTTTACGATTAATATC
TTCTGGAGTCCTTCTTGGAGCGAATACATTTTTATGTAATAAATAGAACATCTTGGAGTGTGCC
```

GAATTTTTTGTGAGAACTCTATGGATTTTCAAGGATCCTTTCATACATTATATTCGATATC  
AAGGAAAATCGATTCTGGGTTCAAGAGGGACTCATTTTTTGATGAAGAAATGGAAATACCA  
CCTTGTTAATTTTTGGCAATATTATTTTCATTTTTGGTCTCAACCATATAGGATTGATATAAA  
GAAATTATCAAATCTTTTATTTTCTGGGTTATTTTTCAAGTGTACAAATTAATTCTTCG  
ATGGTAAGGAATCAAATGCTAGAGAATTCATTTCTGATGGATACTCTTACTAAGAAATTTG  
ATACCATAATCCCAATTATTCCTCTTATTCGATCATTGTCTAAAGCTCAATTTTGTACCGTAT  
CTGGGTATCCTATTAGTAAACCAATTTGGACCGATTTAGCGGATTGTGATATTATTAATAGA  
TTTGGTCGGATATGTAGAAAGCTTTCTACTATCACAGTGGATCCTCAAAAAAACAGAGTTT  
GTATCGAATGAAGTATATACTTCGACTTTCATGTGCCAGAATTTGGCTCGTAAACACAAA  
AGTACTGTACG

>Carthamus tinctorius plastid gene maturase K (matK), partial cds;

ACCCTGTCCATGCAGAAATCTTGGTTCAGGCTCTTCGCTATTGGATAAAAGATGCTTCTTCTT  
TGCATTTATTAAGATTCTTTCTCTATGAGTGTCAATAATTGGGATAGTCTTATTACTTCAAATT  
CAAAGAAAGCCAGTTCCTTTTTTCAAAAAGAAATCACAGACTATTCTTTTTCCTATATACT  
TCTCATGTATGTGAATATGAATCTGGCTTCATCTTTCTCCGTAACCAATCTTCTCACTTACGA  
TCAACATCTTCTGGAGCCCTTCTTGAACGAATATATTTCTATGGAAAAATGGAGCATCTTGC  
AAAAGCCTTTGCCAGGGCTTTTCAAGCTAATTTATGGTTGTTCAAAGATCCTTTCATGCATT  
ATGTTAGGTATCAAGGAAAATCAATTCTTGCTTCAAAGGGACGTTTCTTTTGATGAATAAA  
TGGAAATATTACTTTGTCAATTTCTGGAAATCTTATTTTTACCTGTGGTCTGAACCAGGAAG  
GATTTATGTAAACCAATTATCCAACCATTCCCTTGACTTTCTGGGTTATTGTTCAAGTGTGCG  
GCTAAAGCGTTCAATGGTCCGCAGTCAAATGCTAGAAAATGCATTTCTAATCGATAATGCT  
ATTAATAAATTTGATACTATTGTTCCAATTATGCCTCTGATTGGATCCTTGGCTAAATCTAAA  
TTTTGTAACGCATTGGGGCATCCTATCGGTAAGGTGATTTGGGCAATTTATCAGATTCTGA  
TATTATTGATCGCTTTGGGCGTATATACAGAAACCTTTCTCATTATCATAGTGGATCTTCAA  
AAAAAGAGTTTGTATCGAGTAAAGTATATACTTCGACTTTCCTTGTGCTAGAATTTAGCTC  
GTAACACAAAAGTACTGTACG

>Crocus sativus plastid gene maturase K (matK), partial cds;

ACCCTGTCCATGCAGAAATCTTGGTTCAAATCCTTCAATGCTGGATTCAAGATGTTCTCTTT  
TGCATTTCTTGCATTCTTTCTTACGAATATCATAATTGGAATAGTTTTTAAATTACTCAGA  
ATAAATCTATTTATCTTTTTTCAAAAAGAACTAAAAGACTATTTCCGGTTCCTATACAATCTT  
ATGTATATGAATGTGAATTTGTATTCGTTTTTCTTCGTAAGCACTCTTCTTATTTACGATTCAC  
ATCCTTTCAAACCTTTCTTGAGCGAAGATATTTCTATGGAAAAATGGAACATCTTCAAACAG  
AACATCTTATAATAGTATGTTGTGATTATTTTAAATGGAACCCTATGGTCTTCAAAGATCCTT  
TCATGCATTATGCTCGATGTCAAGGAAAAGCAATTCTGGCTTCAAAGGAACTCATCTTCTG  
ATGAAGAAATGGAAATATAATTTTTGTCAATTTATGGCAAATATTTTTACTTTTGGTATCA  
ATCATAACAGGATCCATATAAACCAACTATCAAACCATTCTTTCCATTTTCTGGGTTATCTTTC  
AAGTTTACTAAAAAATTTCTCGACGGTAAGGAATCAAATGTTAGATAATTCATTTCTAATAG  
ATACTCTTACTATGAAATTTGATACCGCAGTCCCAGTATTTTTCTTATTAGATCTTTATCTA  
AAGCTCAATTTGTACCGTATCGGGACATCCTATTAGTAAGCCCATCTGGACCGATTTATCA  
GATTCTAGTATTATTGAGCGATTTGGTCCGATATGTAGAAATCTTTCTCATTATCATAGTGGG  
TCCTCAAAAAAACAGGGGTTGTATCGAATAAAG

### RUBISCO large subunit sequences

>Crocus sativus plastid gene RUBISCO large subunit (rbcL), partial cds;

ACCACAAACAGAGACTAAAGCAAGTGCTGGATTTAAGGCTGGTGTAAAGATTACAGATT  
GACTTATTATACTCCGGATCACGAAACCAAAGATACTGATATCTTGGCAGCATTCCGAGTA  
ACTCCTCAACCCGGAGTTCCTGCTGAAGAAGCGGGGGCAGCGGTAGCTGCGGAATCTTCTA  
CTGGTACATGGACAACAGTGTGGACTGATGGACTTACCAGTCTTGATCGTTACAAAGGACG  
ATGCTATCATATCGAGGCCGTTGTTGGGGAGGAAAATCAATATATTGCTTATGTAGCTTATC

CTTTAGACCTTTTTGAAGAAGGTTCTGTTACTAATATGTTTACTTCCATTGTGGGTAATGTAT  
TTGGTTCAAAGCCCTACGAGCTCTACGTCTGGAGATTGCGAATCCCCCTGCTTATCC  
AAAACCTTCCAAGGCCACCCCATGGCATCCAGGTTGAAAGAGATAAATTAACAAGTAT  
GGTCGTCCCCTATTGGGATGTACTATTAACCAAAATTGGGATTATCTGCAAAAACTACG  
GTAGAGCGGTTTATGAATGTCTACGCGGTGGACTTGATTTTAC

>*Buddleja officinalis* plastid gene RUBISCO large subunit (rbcL), partial cds;

ACCACAAACAGAGACTAAAGCAAGTGTGGATTCAAAGCGGGTGTAAAGAGTACAAATT  
GACTTATTATACTCCTGAATACGAAACCAAAGATACTGATATCTTGGCAGCATTCCGAGTA  
ACTCCTCAACCTGGAGTTCGCGCTGAAGAAGCAGGGGCCGCGGTAGCTGCCGAATCTTCTA  
CTGGTACATGGACAACCTGTGTGGACCGATGGACTTACGAACCTTGATCGTTACAAAGGGCG  
ATGCTACCACATCGAGCCGTTCTGGAGAAACAGATCAATATATCTGTTATGTAGCTTACC  
CTTTAGACCTTTTTGAAGAAGGTTCTGTTACTAACATGTTTACTTCCATTGTAGGAAATGTAT  
TTGGATTCAAAGCCCTGCGTGCTCTACGTCTGGAAGATCTGCGAATCCCTCCTGCTTATGTT  
AAAACCTTCCAAGGCCCGCCTCATGGGATCCAAGTTGAGAGAGATAAATTGAACAAGTAT  
GGTCGTCCCCTGTTGGGATGTACTATTAACCTAAATTGGGGTTATCTGCTAAAACTATGG  
TAGAGCAGTTTATGAATGTCTTCGCGGTGGACTTGATTTTAC

>*Carthamus tinctorius* plastid gene RUBISCO large subunit (rbcL), partial cds;

ACCACAAACAGAGACTAAAGCAAGTGTGGATTCAAAGCTGGTGTAAAGATTATAAATT  
GACTTATTATACTCCTGACTATAAAACCAAAGGATACTGATATCTTGGCAGCATTTCGAGTAA  
CTCCTCAACCTGGAGTTCGCGCTGAAGAAGCAGGGGCCGAGTAGCTGCCGAATCTTCTAC  
TGGTACATGGACAACCTGTGTGGACCGATGGGCTTACGAGCCTTGATCGTTACAAAGGGCGA  
TGCTATGGAATCGAGCCTGTTCTGGAGAAGAACTCAATTTATTGCTTATGTAGCTTACCC  
ATTAGACCTTTTTGAAGAAGGTTCTGTTACTAACATGTTTACTTCCATTGTAGGTAATGTATT  
TGGGTTCAAAGCCCTGCGTGCTCTACGTCTGGAAGATTTGCGAATCCCTACTGCGTATGTTA  
AAACTTTCCAAGGTCGCGCTCACGGCATCCAAGTTGAGAGAGATAAATTGAACAAGTATGG  
TCGTCCTGTTGGGATGTACTATTAACCTAAATTGGGGTTATCCGCTAAAACTACGGTA  
GAGCTGTTTATGAATGTCTTCGCGGTGGACTTGATTTTAC

>*Gardenia jasminoides* plastid gene RUBISCO large subunit (rbcL), partial cds;

ACCACAAACAGAGACTAAAGCAAGTGTGGATTCAAAGCTGGTGTAAAGAGTACAAATT  
GACTTATTATACTCCTGAATACGAAACCAAAGATACTGATATCTTGGCAGCATTCCGAGTA  
ACTCCTCAACCGGGAGTTCACCTGAAGAAGCGGGGCCGCGGTAGCTGCCGAATCTTCTA  
CTGGTACATGGACAACCTGTGTGGACCGATGGGCTTACCAGCCTTGATCGTTACAAAGGGTCG  
ATGCTATCACATCGAGCCAGTTCCTGGAGAAGAAGATCAATTTATTGCTTATGTAGCTTACC  
CCTTAGACCTTTTTGAAGAAGGTTCTGTTACTAACATGTTTACTTCCATTGTAGGTAATGTAT  
TTGGGTTCAAAGCCCTGCGCGCTCTACGTCTGGAAGATTTGCGAATCCCTACTTCTTATGTT  
AAAACCTTCCAAGGGCCGCTCATGGCATCCAAGTTGAGAGAGATAAATTGAACAAGTAT  
GGTCGTCCCCTGTTGGGATGTACTATTAACCTAAATTAGGTTTATCTGCTAAAACTACGG  
TAGAGCTGTTTATGAATGTCTTCGCGGTGGACTTGATTTTAC

>*Curcuma longa* plastid gene RUBISCO large subunit (rbcL), partial cds;

ACCACAAACAGAGACTAAAGCAAGTGTGGATTTAAAGCTGGTGTAAAGATTACAAATT  
GAATTATTATACTCCTGACTACGAAGTCAAAGATACTGATATCTTGGCAGCATTCCGAGTA  
ACTCCTCAACCTGGAGTTCACCCGAAGAAGCAGGGGCTGCGGTAGCTGCCGAATCTTCCA  
CTGGTACATGGACAACCTGTGTGGACTGATGGACTTACCAGTCTTGATCGTTACAAAGGGCG  
ATGCTACCACATAGAGCCTGTTATTGGGGAGGATAATCAATATATTGCTTATGTAGCTTATC  
CATTAGACCTTTTTGAAGAAGGTTCTGTTACTAACATGTTTACTTCCATTGTGGGTAATGTGT  
TTGGTTCAAAGCCTTACGCGCTCTACGTTTGGAGGATCTGCGAATCCCACTTCCTATTCCA  
AAACTTTCCAAGGCCCGCCTCACGGCATTCAAGTTGAAAGAGATAAGTTGAACAAGTATGG

TCGTCCCCTATTGGGATGTACTATTAAACCAAAATTGGGATTATCTGCAAAAAACTACGGT  
AGAGCAGTTTATGAGTGTCTACGCGGTGGACTTGATTTTAC
